# Supplementary material
Source: MDPI journal article supplement (https://www.mdpi.com/2227-7102/14/4/357)
Supplement: s1 [file s1]

**Supplemental Material.**

**Table S1.** Quality assessment of the included papers.

| No. | Included paper          | Methodological item for rating (1-4)* |                     |               |          |               |               |         |                                 |                           | Total score |
|-----|-------------------------|---------------------------------------|---------------------|---------------|----------|---------------|---------------|---------|---------------------------------|---------------------------|-------------|
|     |                         | Abstract & title                      | Introduction & aims | Method & data | Sampling | Data analysis | Ethics & bias | Results | Transferability (generalizable) | Implications & usefulness |             |
| 1   | Master et al., 2017     | 3                                     | 4                   | 3             | 2        | 3             | 2             | 4       | 3                               | 3                         | 27          |
| 2   | Kazakoff & Bers, 2014   | 3                                     | 4                   | 4             | 4        | 2             | 4             | 3       | 3                               | 3                         | 30          |
| 3   | Kazakoff et al., 2013   | 3                                     | 3                   | 3             | 3        | 2             | 3             | 2       | 3                               | 2                         | 24          |
| 4   | Kazakoff et al., 2013   | 3                                     | 3                   | 3             | 3        | 2             | 3             | 2       | 3                               | 2                         | 24          |
| 5   | McDonald & Howell, 2012 | 3                                     | 3                   | 3             | 2        | 3             | 1             | 4       | 3                               | 3                         | 25          |
| 6   | Miller, 2019            | 4                                     | 4                   | 4             | 4        | 4             | 4             | 4       | 4                               | 3                         | 35          |
| 7   | Castro et al., 2018     | 4                                     | 4                   | 3             | 3        | 3             | 2             | 3       | 2                               | 3                         | 27          |
| 8   | Sullivan & Bers, 2016   | 4                                     | 4                   | 3             | 3        | 3             | 2             | 4       | 3                               | 3                         | 29          |
| 9   | Sullivan & Bers, 2018   | 4                                     | 4                   | 3             | 2        | 3             | 1             | 4       | 3                               | 3                         | 27          |
| 10  | Di Lieto et al., 2017   | 3                                     | 3                   | 3             | 2        | 2             | 1             | 3       | 3                               | 2                         | 22          |
| 11  | Sullivan & Bers, 2019   | 4                                     | 3                   | 3             | 3        | 4             | 2             | 3       | 3                               | 3                         | 28          |

| No. | Included paper              | Methodological item for rating (1-4)* |                     |               |          |               |               |         |                                 |                           | Total score |
|-----|-----------------------------|---------------------------------------|---------------------|---------------|----------|---------------|---------------|---------|---------------------------------|---------------------------|-------------|
|     |                             | Abstract & title                      | Introduction & aims | Method & data | Sampling | Data analysis | Ethics & bias | Results | Transferability (generalizable) | Implications & usefulness |             |
| 12  | Sullivan et al., 2013       | 3                                     | 3                   | 3             | 3        | 2             | 3             | 3       | 4                               | 3                         | 27          |
| 13  | Karp & Maloney, 2013        | 4                                     | 2                   | 4             | 3        | 4             | 1             | 3       | 3                               | 2                         | 26          |
| 14  | Sheehan et al., 2019        | 3                                     | 4                   | 3             | 3        | 3             | 2             | 3       | 2                               | 3                         | 26          |
| 15  | Pila et al., 2019           | 4                                     | 4                   | 3             | 2        | 4             | 3             | 3       | 3                               | 3                         | 29          |
| 16  | Miller, 2018                | 4                                     | 4                   | 4             | 3        | 4             | 3             | 4       | 3                               | 3                         | 32          |
| 17  | Schroeder & Kirkorian, 2016 | 4                                     | 4                   | 4             | 3        | 4             | 2             | 3       | 3                               | 3                         | 30          |
| 18  | Aladé et al., 2016          | 3                                     | 4                   | 4             | 4        | 4             | 2             | 3       | 3                               | 3                         | 30          |
| 19  | Aldemir & Kermani, 2017     | 3                                     | 3                   | 4             | 3        | 3             | 4             | 4       | 4                               | 3                         | 31          |
| 20  | Paulsen & Andrews, 2014     | 2                                     | 2                   | 2             | 3        | 3             | 1             | 2       | 1                               | 2                         | 18          |
| 21  | Taylor, 2018                | 3                                     | 4                   | 3             | 1        | 3             | 2             | 3       | 2                               | 3                         | 24          |
| 22  | Jowett et al., 2012         | 4                                     | 4                   | 2             | 1        | 3             | 2             | 3       | 2                               | 3                         | 24          |

*Note.*

\* Criteria of ratings followed the statements listed as below,

a) Abstract and title: Did they provide a clear description of the study?

*Good (4) - Structured abstract with full information and clear title.*

*Fair (3) - Abstract with most of the information.*

*Poor (2) - Inadequate abstract.*

*Very Poor (1) - No abstract.*

b) Introduction and aims: Was there a good background and clear statement of the aims of the research?

*Good (4) - Full but concise background to discussion/study containing up-to-date literature review and highlighting gaps in knowledge. Clear statement of aim AND objectives including research questions.*

*Fair (3) - Some background and literature review. Research questions outlined.*

*Poor (2) - Some background but no aim/objectives/questions, OR Aims/objectives but inadequate background.*

*Very Poor (1) - No mention of aims/objectives. No background or literature review.*

c) Method and data: Is the method appropriate and clearly explained?

*Good (4) - Method is appropriate and described clearly (e.g., questionnaires included). Clear details of the data collection and recording.*

*Fair (3) - Method appropriate, description could be better. Data described.*

*Poor (2) - Questionable whether method is appropriate. Method described inadequately. Little description of data.*

*Very Poor (1) - No mention of method, AND/OR Method inappropriate, AND/OR No details of data.*

d) Sampling: Was the sampling strategy appropriate to address the aims?

*Good (4) - Details (age/gender/race/context) of who was studied and how they were recruited. Why this group was targeted. The sample size was justified for the study. Response rates shown and explained.*

*Fair (3) - Sample size justified. Most information given, but some missing.*

*Poor (2) - Sampling mentioned but few descriptive details.*

*Very Poor (1) - No details of sample.*

e) Data analysis: Was the description of the data analysis sufficiently rigorous?

*Good (4) - Clear description of how analysis was done. Qualitative studies: Description of how themes derived/respondent validation or triangulation.*

*Quantitative studies: Reasons for tests selected hypothesis driven/numbers add up/statistical significance discussed.*

*Fair (3) - Qualitative: Descriptive discussion of analysis. Quantitative.*

*Poor (2) - Minimal details about analysis.*

*Very Poor (1) - No discussion of analysis.*

f) Ethics and bias: Have ethical issues been addressed, and what has necessary ethical approval gained? Has the relationship between researchers and participants been adequately considered?

*Good (4) - Ethics: Where necessary issues of confidentiality, sensitivity, and consent were addressed. Bias: Researcher was reflexive and/or aware of own bias.*

*Fair (3) - Lip service was paid to above (i.e., these issues were acknowledged).*

*Poor (2) - Brief mention of issues.*

*Very Poor (1) - No mention of issues.*

g) Results: Is there a clear statement of the findings?

*Good (4) - Findings explicit, easy to understand, and in logical progression. Tables, if present, are explained in text. Results relate directly to aims. Sufficient data are presented to support findings.*

*Fair (3) - Findings mentioned but more explanation could be given. Data presented relate directly to results.*

*Poor (2) - Findings presented haphazardly, not explained, and do not progress logically from results.*

*Very Poor (1) - Findings not mentioned or do not relate to aims.*

h) Transferability or generalizability: Are the findings of this study transferable (generalizable) to a wider population?

*Good (4) - Context and setting of the study is described sufficiently to allow comparison with other contexts and settings, plus high score in Question (d) (sampling).*

*Fair (3) - Some context and setting described, but more needed to replicate or compare the study with others, PLUS fair score or higher in Question (d).*

*Poor (2) - Minimal description of context/setting.*

*Very Poor (1) - No description of context/setting.*

i) Implications and usefulness: How important are these findings to policy and practice?

*Good (4) - Contributes something new and/or different in terms of understanding/insight or perspective. Suggests ideas for further research. Suggests implications for policy and/or practice.*

*Fair (3) - Two of the above (state what is missing in comments).*

*Poor (2) - Only one of the above.*

*Very Poor (1) - None of the above.*

Retrieved from: Appendix D (p. 1296-1297) of Hawker, S., Payne, S., Kerr, C., Hardey, M., & Powell, J. (2002). Appraising the evidence:

Reviewing disparate data systematically. *Qualitative Health Research*, 12(9), 1284-1299. doi:10.1177/1049732302238251
